# Supplementary material
Source: bioRxiv or medRxiv preprint supplement (https://medrxiv.org/highwire/filestream/86951/field_highwire_adjunct_files/1/2020.06.20.20136382-2.pdf)
Supplement: Supplementary file [file 2020.06.20.20136382-2.pdf]

# Supplementary material 2: Data and analysis scripts

This document contains supplementary material to “Behavioral changes before lockdown, and decreased retail and recreation mobility during lockdown, contributed most to the successful control of the COVID-19 epidemic in 35 Western countries” by Koen Deforche, Jurgen Vercauteren, Viktor Mller, and Anne-Mieke Vandamme.

Here we describe the organization of the github repository which contains the data files and scripts that can be used to reproduce the results.

## 1 Source code and data

The source code and analysis files are hosted at: <https://github.com/kdeforche/epi-western-analysis>. Here we describe the main analysis scripts, data files, and steps to do the analysis.

### 1.1 R analysis scripts

**R/data/ecdc/data.R** script for estimating  $d_1$  and  $d_2$  from Google Mobility data, and reading and preparing ECDC data for one country for analysis.

**R/models/model-tv2-cmp.R** model used for main analysis

**R/models/model-tv3-cmp.R** model used for analysis of Slovakia with an additional transition point in  $R_t$ .

**R/MCMC/fitMCMC-drj.R** R script to estimate the model parameters using MCMC for one data set.

**R/MCMC/analyzeMCMC.R** R script to analyze an estimated model for one data set.

**analyses/ecdc/analysis.R** R script to calculate cross-country statistics

### 1.2 Data files

**R/data/ecdc/ecdc.csv** Data of incidence and deaths retrieved from ECDC <https://opendata.ecdc.europa.eu/covid19/casedistribution/csv> on 6 June 2020.

**R/data/ecdc/Global\_Mobility\_Report.csv** Google Mobility Report retrieve fromd Google <https://www.google.com/covid19/mobility/> on 4 May 2020.

## 2 Analysis steps

### 2.1 Bayesian model parameter estimation

To obtain a sample from the posterior distribution of parameters fitted to data for a country with 2-letter country code  $CC$ , using the model-tv2-cmp.R:

```
cd analyses/ecdc/tv2-cmp
Rscript ../../R/MCMC/fitMCMC-drj.R --args CC
```

The samples are subsequently analyzed to infer marginalized estimates, using :

```
Rscript ../../R/MCMC/analyzeMCMC.R --args CC
```

2 This results in a file `CC_analysis.csv`, a plot of key parameters for the samples `CC_sample.pdf` that were  
3 used (without burn-in), and a figure with the 6 epidemiological graphs (of Suppl 4), `CC_graphs.pdf`.

4  
5 The same steps are used to re-estimate a model for Slovakia but then in the `tv3-cmp` folder.

## 6 **2.2 Statistical analyses**

7 First combine all of the analysis CSV files (each containing 1 data line), into a single CSV file, using:

```
8  
45 head -n 1 BE_analysis.csv > analysis.csv  
46 for i in HU CA IL GR AT BA BE BY CH CZ DE EE DK ES FI FR GB HR IT LT LU IE LV MD MK NL NO PL  
47 PT RO RS SE SI SK US; do tail -q -n1 $i_analysis.csv >> analysis.csv; done
```

48  
49 Next run the commands from `analysis.R` in the folder with the resulting `analysis.csv` CSV file.
